# 1 Gap perception in bumblebees

2

3 Sridhar Ravi<sup>1&2</sup>, Olivier Bertrand<sup>1</sup>, Tim Siesenop<sup>1</sup>, Lea-Sophie Manz<sup>1&3</sup>, Charlotte  
4 Doussot<sup>1</sup>, Alex Fisher<sup>2</sup> & Martin Egelhaaf<sup>1</sup>

5

6 <sup>1</sup>. Department of Neurobiology and Cluster of Excellence Cognitive Interaction Technology (CITEC), Bielefeld  
7 University

8 <sup>2</sup>. School of Engineering, RMIT University, [Sridhar.ravi@rmit.edu.au](mailto:Sridhar.ravi@rmit.edu.au) Department of Neurobiology, Bielefeld  
9 University

10 <sup>5</sup>. Department of Biology, Johannes Gutenberg-Universität Mainz

11

12

## 13 Abstract

14

15 A number of insects fly over long distances below the natural canopy where the physical  
16 environment is highly cluttered consisting of obstacles of varying shape, size and  
17 texture. While navigating within such environments animals need to perceive and  
18 disambiguate environmental features that might obstruct their flight. The most  
19 elemental aspect of aerial navigation through such environments is gap identification  
20 and passability evaluation. We used bumblebees to seek insights into the mechanisms  
21 used for gap identification when confronted with an obstacle in their flight path and  
22 behavioral compensations employed to assess gap properties. Initially, bumblebee  
23 foragers were trained to fly through an unobstructed flight tunnel that led to a foraging  
24 chamber. After the bees were familiar with this situation, we placed a wall containing a  
25 gap that unexpectedly obstructed the flight path on a return trip to the hive. The flight  
26 trajectories of the bees as they approached the obstacle wall and traversed the gap were  
27 analyzed in order to evaluate their behavior as a function of the distance between the  
28 gap and a background wall that was placed behind the gap. Bumblebees initially  
29 decelerate when confronted with an unexpected obstacle. Deceleration was first noticed  
30 when the obstacle subtended around 35° on the retina but also depended on the  
31 properties of the gap. Subsequently the bees gradually traded off their longitudinal  
32 velocity to lateral velocity and approached the gap increasing lateral displacements and  
33 lateral velocity. Bumblebees shaped their flight trajectory depending on the salience of  
34 the gap, in our case, indicated by the optic flow contrast between the region within the

35 gap and on the obstacle, which increases with decreasing distance between the gap and  
36 the background wall. As the optic flow contrast decreased the bees spent increasing  
37 time moving laterally across the obstacles. During these repeated lateral maneuvers the  
38 bees are likely assessing gap geometry and passability.

39

40

## 41 **Introduction**

42

43 Even with relatively tiny brains insects display a rich repertoire of behaviors, the  
44 operation of many of which still remains unclear. Aerial locomotion below the natural  
45 canopy is one such behavior that has received increased attention in the last decade  
46 from both biologists and engineers alike (Shyy et al., 2016). Natural flight at the small  
47 scale of insects, where the sensory and mechanical constraints are particularly  
48 challenging, requires the concerted coordination of their computationally parsimonious  
49 sensorimotor system (Dudley, 2002). The spatial environment close to the Earth's  
50 surface consists of a myriad of natural and artificial objects that can vary widely in  
51 shape, size and texture. This renders the physical environment to be unpredictable and  
52 poses challenges to aerial locomotion. Steady level flight for sustained durations is  
53 generally unfeasible in this domain with obstacles constantly coming in the way. Thus,  
54 in order to achieve safe transit through such environments flying systems need to be  
55 adept at perceiving the environment to identify obstacles and devise alternative flight  
56 paths. From a biophysical standpoint, apart from performance limitations based on  
57 allometric body size scaling other factors, such as collision avoidance and properties of  
58 the physical environment, also influence flight trajectories and overall performance of  
59 insects (Crall et al., 2015; Dudley, 2002). Terrestrially bound insects utilize a number of  
60 strategies at the sensory and motor level in dealing with cluttered and uneven terrain  
61 including active and passive body compliance, gait coordination, and preflexion. A  
62 commensurate level of understanding is yet to be arrived at for flying animals.

63

64 Unlike during legged locomotion where tactile sensory inputs can augment vision in  
65 gaining environmental information, flying insects rely only on the latter for safe passage  
66 and path planning. For long distance navigation, flying insects might use, apart from  
67 vision, other sensory modalities such as odor and geomagnetic fields (Knaden and  
68 Graham, 2016) In order for a flying animal to arrive at its intended destination or ensure  
69 safe locomotion, at a basic level, the animal needs to process the obstacles that lie in its  
70 path and identify gaps. Obstacle and gap detection may thus be considered the most

71 basic element of flight through clutter. A few recent studies have analysed the response  
72 of flying insects in minimally cluttered environments and revealed that when confronted  
73 with obstacles with varying spacing, insects such as bumblebees and honeybees choose  
74 the larger gap (Baird and Dacke, 2016; Ong et al., 2017). This might seem as an obvious  
75 response, yet it highlights the active response of insects in avoiding collisions, which  
76 otherwise can result in irreparable damage to body and wings. Baird and Dacke (2016)  
77 suggested bumblebees may utilize a simple brightness based strategy in making a choice  
78 among the different gaps, i.e. bigger gaps are likely to be brighter than smaller gaps.  
79 Though a few experiments have observed insects behaving around individual obstacles  
80 and minimally cluttered environments, the mechanisms mediating the elemental  
81 process of obstacle and gap perception and the factors that influence the assessment of  
82 passability are still unclear.

83  
84 Especially fast flying animals, such as many insect species, rely on optic flow as the main  
85 source of spatial information, i.e. on the continuous stream of retinal image changes  
86 induced during self-motion and, thus, is particularly relevant for behavior in cluttered  
87 environments (Egelhaaf 2006; Egelhaaf et al., 2012). Optic flow has also been shown to  
88 aid in estimating flight distance, flight path centering, identifying foraging locations and  
89 many other behaviorally relevant tasks, see (Baird et al., 2013; Kern et al., 2012; Serres  
90 and Ruffier, 2017; Serres et al., 2008; Srinivasan, 2015; Srinivasan and Zhang, 1997).  
91 Observations of the flight trajectory of insects such as flies and bees has shown that  
92 insects actively shape the temporal structure of their visual input by employing  
93 prototypical flight maneuvers, especially to separate translational from rotational optic  
94 flow and, thus, to facilitate discerning spatial information about the surroundings  
95 (Braun et al., 2010; Braun et al., 2012; Egelhaaf et al., 2012b). Rotations that are  
96 inevitably required to change flight direction are squeezed into brief saccadic turns with  
97 rotation velocities often exceeding 4000deg/s (Hateren and Schilstra, 1999). Between  
98 saccadic turns the insect keeps its gaze basically straight for more than 80% of overall  
99 flight time to induce purely translational optic flow (Boeddeker et al., 2010; Braun et al.,  
100 2012; Dickinson, 2005; Hateren and Schilstra, 1999; Mertes et al., 2015; Schilstra and  
101 Hateren, 1999). Since only the translational optic flow contains spatial information, this  
102 active flight and gaze strategy is believed to facilitate spatial vision and thus may be  
103 particularly relevant for navigation in cluttered terrain (Egelhaaf et al., 2014). However  
104 this vision-based strategy relying on the closed action perception loop has not been  
105 investigated systematically in cluttered environment and, thus, needs further  
106 investigation. Specifically, how does an insect react to unexpected obstacles obstructing

107 its flight path? What flight maneuvers does it perform in order to detect gaps and assess  
108 passability?

109

110 Here we sought to uncover the mechanisms implemented by flying insects in gap  
111 identification and perception. Bumblebees are excellent model organisms because much  
112 is known about their flight and navigational performance (Baird and Dacke, 2012; Crall  
113 et al., 2014; Mirwan and Kevan, 2013; Osborne et al., 2008; Ravi et al., 2013; Riabinina et  
114 al., 2014; Lobecke et al. 2018). We presented unsuspecting bumblebees with an altered  
115 environment consisting of a wall obstructing their flight path but containing a gap that  
116 prevented direct passage to their goal and observed their behavior as they approached  
117 and traversed the gap. We analyzed the flight trajectory of the bees in different distances  
118 from the gap and computed key visual metrics such as: angle subtended by the obstacle  
119 and gap on the retina, mean optic flow and optic flow contrast, in order to identify  
120 factors that influence gap identification and assessment of passability. Our data suggest  
121 that bumblebees employ an active gazing flight strategy in enabling the identification of  
122 gaps and critical environmental parameters that affects safe passage.

123

124

## 125 **Materials and Methods**

126

### 127 **Experiment Setup**

128

129 Experiments were conducted with individuals from a *Bombus terrestris* colony that was  
130 maintained within the lab. A healthy hive sourced from a commercial breeder (Biobest  
131 Group NV, Westerlo, Belgium) was placed within a 0.5x0.5x0.3m mesh enclosure that  
132 was covered with dark cloth to simulate the natural underground habitat of the bees.  
133 The hive enclosure was connected to a flight tunnel 0.25x0.25x1.5m that lead to a  
134 1x1x0.75m foraging chamber where gravity feeders containing 30%/vol. sucrose  
135 solution blended with 1% commercial honey were placed. Connections between the  
136 hive enclosure, flight tunnel and foraging chamber were made using 30mm ID and  
137 150mm long flexible silicon tubing. Finely ground pollen was placed directly within the  
138 hive and bees were permitted to access sucrose in the foraging chamber ad libitum.  
139 Consistent foraging flights by numerous (>20) worker bees were observed within one  
140 day of immigration to the enclosure. The bees and hive were given one week for  
141 habituation to the environment before experiments.

142

143 During experiments gates on either sides of the flight tunnel were used to regulate  
144 traffic, and only one bee at a time was permitted to enter the flight tunnel. Only bees  
145 returning to the hive were considered for analysis. The experiment procedure will be  
146 described from the perspective of the bee returning to the hive as per Fig. 1a. An  
147 obstacle was created within the flight tunnel by placing an artificial vertical wall that  
148 contained a rectangular hole that was 50mm wide and started from the middle  
149 extending to the top, see Fig. 1a. The sidewalls of the tunnel were lined with an  
150 achromatic random checkerboard pattern while the floor was lined with a random cloud  
151 with spatial frequencies varying by  $1/f$ , similar to the one used by (Monteagudo et al.,  
152 2017). A second vertical wall was placed behind the wall containing the gap. The same  
153 checkerboard pattern was also placed on both obstructing verticals, Fig. 1. Five different  
154 experiment conditions were tested where the distance between the gap and rear wall  
155 was varied by 550, 300, 150, 50 or 0 mm. During the different scenarios the wall  
156 containing the gap was always placed at 0.9m from the entrance of the tunnel, see Fig.  
157 1a. Twenty flights were recorded for each condition while the conditions were varied  
158 pseudo-randomly between each recording. Once the bees approached and passed the  
159 gap the rear wall was removed to permit their onward flight back to the hive. For the  
160 condition when the rear wall was adjacent to the gap ( $d = 0\text{mm}$ ) passage was obviously  
161 impossible, once 20 sec of recording was completed, the wall with the gap and rear wall  
162 were both removed by opening the roof of the flight tunnel. We also observed the flight  
163 of the bees when the wall behind the gap was lined with non-textured white paper and  
164 placed immediately adjacent to the gap, i.e. similar to the  $d = 0\text{mm}$ , Fig. 1.

165

166 To ensure we captured the response of naïve bees dealing with a complex environment  
167 and negotiating a gap, experiment bouts lasted no longer than 1 hour, and the gap and  
168 rear wall were removed after each flight recording to inhibit the bees from becoming  
169 familiar with the experiment paradigm. Bees were not individually marked in this study,  
170 though this increased the possibility of taking unequal numbers of measurements  
171 amongst the different individuals for each condition, the likelihood was greatly reduced  
172 since consecutive flights were taken from different bees returning to the hive from the  
173 foraging arena. Additionally, due to the large number of foragers and flight trajectories  
174 recorded it is likely to be representative of the population. All experiments were  
175 completed within five consecutive days.

176

177

178

## 179 **Fight Trajectory Analysis and Optic Flow Estimation**

180

181 An Optronis CR6 high-speed camera was placed 1.7m above the midline of the flight  
182 tunnel looking directly downward. The flights of the bees were recorded at 200Hz, and a  
183 region covering 950mm leading to the gap was kept in the field of view. During post  
184 processing lens distortion was corrected by using standard MATLAB Image Processing  
185 Toolbox routines. An object of known dimension was placed within the field of view at  
186 mid-height of the tunnel and related to the pixels in the rectified image for 2D spatial  
187 calibration. Custom MATLAB code was written to process each frame and fit an ellipse to  
188 the body of the bees; subsequently the centroid location, body length and heading were  
189 all measured over the entire flight. The bees displayed a wide diversity in flight  
190 behaviors. In the flight tunnel flights ranged from appearing to explore the space to  
191 making directed flights along the tunnel. Only flights of individuals that appeared to be  
192 returning from foraging trips, considered as those bees that made a steady and direct  
193 flight towards the gap, were used for analysis. At least one such flight was observed  
194 every minute. Among all the flights recorded the body length of the individual bee varied  
195 by less than 5% indicative of the nominally constant altitude maintained during the  
196 entire flight. In order to attenuate digitizing error the flight trajectories were passed  
197 through a 30Hz 2<sup>nd</sup> order Butterworth filter. Flight speed along the longitudinal and  
198 lateral directions was estimated by differentiating the flight trajectory along the  
199 respective axis and applying a coordinate transformation matrix to obtain body  
200 centered values. Heading orientation was calculated with respect to the flight tunnel  
201 using the right-hand-rule. Since the flights were recorded only through a single  
202 perspective, pitch and roll could not be measured.

203

204 Geometric optic flow measured as the angular displacement of the vector between an  
205 arbitrary point in space and the retina due to relative motion, see EQU1 was calculated  
206 in MATLAB using the flight trajectory and flight tunnel geometry. Here, for each flight in  
207 all conditions the true optic flow of only the wall containing the gap and the rear wall  
208 was calculated using the respective flight trajectory, assuming constant head-body  
209 alignment, a spherical eye and the retina approximated as a point. A similar approach  
210 has been implemented in numerous previous studies (Bertrand et al., 2015; Floreano et  
211 al., 2010; Serres and Ruffier, 2017; van Breugel et al., 2014).

212

213 A total of 100 flights (20/condition x 5 conditions) were recorded, and statistical  
214 significance of the variation in quantities between experiment conditions was tested

215 using a on way ANOVA and a Tukey Post-Hoc test confirmed significant conditions  
216 within the group. For comparison of quantities within each experiment condition a  
217 paired t-test was used to assess statistical significance. No statistical analysis was  
218 conducted for the condition where a glossy white background was placed immediately  
219 in the rear of the gap, only five flights was permitted and the analysis was qualitative.

220

## 221 **Results**

222

223 Upon entering the flight tunnel all bees took off and flew smoothly as they approached  
224 the unfamiliar wall blocking their flight path. For all experiment conditions enroute to  
225 the gap the flight trajectories of the bees were not straight, but contained some smooth  
226 lateral movements, see Fig. 1b-f. The bees performed increased lateral maneuvers closer  
227 to the gap as the distance between the gap and rear wall was reduced, see Fig. 1d-f. For  
228 conditions when the distance between the gap and rear was <60mm the bees engaged in  
229 forward facing crescent-shaped maneuvers close to the gap (<100mm), see Fig. 1e, prior  
230 to passing through. When the gap was not present i.e. the rear wall was directly adjacent  
231 to the gap, the bees continued to perform crescent flight while facing forwards close to  
232 the center of the tunnel with increasing arc size. None of the bees attempted to pass  
233 through in this condition, see Fig. 1f. This also included the condition when a non-  
234 textured white wall was placed immediately adjacent to the gap, similar to the  $d = 0\text{mm}$   
235 condition (data not shown). An apparent increase in the sideward component in the  
236 flight path is evident with decreasing distance between the gap and rear wall. These  
237 crescent shaped flight paths bear nominal similarity to learning flights of bumblebees  
238 after they leave their nest hole and are assumed to gather information about its  
239 surroundings (e.g. Lobecke et al., 2018; Philippides et al., 2013).

240

241 In order to quantify the flight trajectories, the tunnel was binned into six segments and  
242 the longitudinal flight speed of the bees within each bin was calculated, see Fig. 2a.  
243 Irrespective of the distance between the gap and rear wall, the flight speed among the  
244 different individuals remained statistically similar when they were >375mm to the gap,  
245 Fig. 2a ( $F(4,95) = 0.79$ ,  $p = 0.55$ ). The flight speed of the bees within this region was  
246 nominally similar to those reported by (Baird et al., 2010) where a similar sized tunnel  
247 was used. However there exists considerable variation in flight speed (up to 1.5x  
248 variation in magnitude) among the different flights across all conditions. At distances  
249 <375mm the bees approached the gap while steadily decelerating wherein the rate of  
250 deceleration was dependent on the distance between the gap and background, Fig. 2a.

251 The mean longitudinal velocity of the bees was significantly lower when the distance  
252 between the gap and rear wall was <150mm ( $d = 150\text{mm } p = 0.043$ ,  $d = 60\text{mm } p = 0.029$   
253 &  $d = 0\text{mm } p = 0.0068$ ). When  $d > 150\text{mm}$  the longitudinal velocity was lower but not  
254 statistically significant,  $d = 300\text{mm } p = 0.068$  &  $d = 550\text{mm } p = 0.075$ . For the  $d = 550$ ,  
255 300 and 150mm the flight speed of the bees was significant reduced when they were  
256 <225mm to the gap compared to when they were <375mm ( $d = 550\text{mm } p = 0.022$ ,  $d =$   
257  $300\text{mm } p = 0.046$  and  $d = 150\text{mm } p = 0.013$ ), Fig. 2a. When the bees where <150mm to  
258 the gap there was a monotonic reduction in their mean speed with decreasing distances  
259 between the gap and rear wall ( $F(4,95) = 3.18$ ,  $p = 0.02$ ).

260

261 For all experiment conditions, the mean absolute lateral speed of the bees was small but  
262 existent at large distances to the gap (>225mm) and monotonically increased as they  
263 approached the gap, see Fig. 2b. Unlike the longitudinal speed, the mean absolute lateral  
264 flight speed did not become significantly different across the different conditions until  
265 the bees were <225mm; in this condition the bees' lateral velocity was maximum when  
266 the rear wall was adjacent to the gap ( $d = 0 \text{ } p = 0.00935$ ), Fig. 2b. Similar to the forward  
267 speed, the rate of increases in the mean lateral speed of the bees was also dependent on  
268 the distance between the gap and rear wall. By comparing the ratio of mean lateral  
269 speed to the total speed of the bees it is evident that the bees summarily increase their  
270 mean lateral movement over longitudinal movement, Fig. 2c. For the non-passable  
271 condition where  $d = 0$  over the duration of the recording the bees mostly moved  
272 laterally at distances <75mm to the gap (Fig. 2b&c). The lateral distance traveled by the  
273 bees within each segment also increased, as they got closer to the gap. This can also be  
274 qualitatively observed in the representative flight trajectories, Fig. 1b-f.

275

276 To further understand the mechanics of the lateral movements and the flight maneuvers  
277 performed close to the gap for conditions where the distance between gap and rear wall  
278 was small, the total acceleration of the bees in the body coordinate system at three  
279 different segments along the tunnel was represented as a rose histogram, Fig. 3. The  
280 length of each angular column in the rose histogram indicates probability of the total  
281 acceleration of the bee to be within the range of the respective bin. This was done for the  
282  $d = 0\text{mm}$  condition where lateral movements were most significant. The angle between  
283 the total acceleration and the long axis of the body was binned into twenty segments of  
284  $18^\circ$  width for all recorded flights. When the bees were >375mm from the gap, the total  
285 acceleration was oriented laterally with respect to their body and minimally in  
286 longitudinal direction. Between 375 – 150mm to the gap the bees began decelerating



287 (Fig. 3b), and this is evident in the acceleration histogram where the total acceleration  
288 was distributed mostly laterally with a rearward skew (2<sup>nd</sup> & 3<sup>rd</sup> quadrant). In the  
289 proximal regions of the gap (<150mm) the total acceleration was predominantly  
290 orientated orthogonal to the long body axis, Fig. 3c. The magnitude of acceleration, as  
291 indicated by the hue in Fig. 3, was also lowest when the bees were far from the gap. It  
292 progressively increased near the gap where the flight was characterized by the largest  
293 accelerations oriented nominally orthogonal to the longitudinal axis, Fig. 3a-c.

294

295

### 296 **Optic Flow Analysis**

297

298 The above results clearly revealed that flight behavior of bumblebees is strongly  
299 affected by the distance between the gap and the rear wall. The most likely cue  
300 providing information about the spatial layout under the different conditions is the optic  
301 flow within the gap and in the adjacent parts of the visual field. Therefore, we  
302 determined the optic flow difference between inside and outside the gap. The mean of  
303 the absolute difference in total geometric optic flow across the inside and outside edge  
304 of the gap ( $\pm 12$  mm along gap edge) is presented Fig. 4a. As expected, the difference in  
305 optic flow across the edge of the gap was low when the bees were far from the gap and it  
306 progressively increased as the bees neared the gap. Until the bees were <225mm from  
307 the gap the difference in mean optic flow across the edge decreased significantly with  
308 decreasing distance between the gap and the rear wall. However, in the near vicinity of  
309 the gap (<150mm) the mean optic flow difference across the edge of the gap was  
310 relatively lower and not statistical significant across the  $d = 550 - 60$ mm conditions  
311 ( $F(4,95) = 0.28$ ,  $p = 0.74$ ), Fig. 4a. The optic flow difference for the  $d = 0$  is nonzero (Fig.  
312 4a) because of the offset in the wall position due to their thickness (1.5mm). The mean  
313 optic flow on the wall containing the gap and the rear wall when the bees were <150mm  
314 to the gap for all conditions is presented in Fig. 4b-f. A sharp discontinuity in the mean  
315 optic flow at the edge of the gap is present when the rear wall is further away from the  
316 gap, consequently, the distinctness of the gap clearly decreases with decreasing distance  
317 between the gap and the rear wall in the different experiment conditions.

318

319 The difference in optic flow across the edge of the wall was normalized with respect to  
320 the optic flow 12 mm outside the gap edge, on the wall containing the gap, to reveal the  
321 mean motion contrast for the different conditions, see Fig. 5a. For all flights only the  
322 flight trajectories of the bees when they were <75mm to the gap were considered for the

323 contrast estimation. A high motion contrast was present only when the distance  
324 between the gap and rear wall was large and it monotonically decreased with  
325 decreasing distance. Concomitant with the decreasing motion contrast an opposite trend  
326 was noted with the time spent by the bees in the near vicinity of the gap (<75mm)  
327 before passage, Fig. 5b. Bees spent a longer time <75mm to the gap as the distance  
328 between the between the gap and rear wall decreased from 550 to 0 mm, Fig. 5b. For the  
329 extreme condition when gap passage was impossible ( $d = 0$ ) the time spent was not  
330 calculated since the bees continued to traverse laterally and no attempts to pass were  
331 made. We can conclude that the bees spend more time exploring the situation close to  
332 the gap when the optic flow contrast across the gap and, thus, the distance between the  
333 gap and the rear wall gets smaller. At the same time, they increase the lateral velocity as  
334 a means to increase velocity contrast.

335

336

### 337 **Discussion**

338

339 Despite their tiny brains, bumblebees and other eusocial insects display a remarkable  
340 capacity for navigation through inherently complex environments. The most elemental  
341 aspect for locomotion through a cluttered terrain is the identification of a gap between  
342 obstacles and subsequently assessing passability. In our experiments we sought insights  
343 into the salient mechanisms utilized by bumblebees to identify a gap when presented  
344 with an unexpectedly altered environmental situation relative to the conditions of an  
345 unobstructed tunnel the bees were familiar with. The bumblebees could thus not learn  
346 the gap properties. By considering only bees that were used to returning to the hive  
347 through a familiarized unobstructed flight tunnel we exploited the high motivational  
348 state of the organism in identifying a route through the altered environment that  
349 required passage through the gap. In an alternative setup when the gap was presented  
350 to bees that were en route from the hive to the foraging chamber, the bees were much  
351 less amenable to the experimental paradigm and chose to return to the safety of the  
352 hive.

353

354 Bees and other insects might also rely on other cues in facilitating gap detection and  
355 passage decision making when flying through cluttered environments such as  
356 brightness as shown by (Baird and Dacke, 2016). The few conditions in our  
357 experimental analysis where a white background was placed immediately rear of the  
358 gap created a scenario where high optic flow difference across the gap was present but

359 nearly zero optic flow within the gap. In this condition none of the bees attempted to  
360 pass suggesting that apart from the difference in optic flow across the edges of the gap, a  
361 non-zero optic flow within the gap maybe one of the conditions necessary for passage,  
362 because only with optic flow inside the gap information about the spatial situation  
363 behind the gap may be available. Additionally, the homogenous lighting used in our  
364 setup might have not created the necessary brightness difference across the edges of the  
365 gap to elicit a brightness-based response. Further investigations are necessary to  
366 identify the presence of such virtuosic strategies.

367

### 368 **Approach**

369

370 When the bees were far from the gap their flight trajectory seemed to be driven by the  
371 well-established mechanism of equalizing bilateral optic flow. Since the spatial  
372 information on the side walls of the tunnel were similar, nominally consisting of  
373 amplitudes varying by 1/frequency (Monteagudo et al., 2017) and a nominally  
374 homogeneous illumination, the bees flew close to the centerline of the flight tunnel. This  
375 is a familiar feature observed in a number of previous studies that have utilized flight  
376 tunnels to study insect and bird flight (Bhagavatula et al., 2011; Schiffner et al., 2014;  
377 Srinivasan, 2010). Apart from balancing bilateral optic flow, the flight speed has also  
378 been shown to be dependent on the overall width of the flight tunnel as well as its  
379 texture. Under the conditions of our experiments, the bees flew at around 0.7m/s in the  
380 far field of the gap which was similar to those measured by (Baird et al., 2010) where a  
381 similar experiment paradigm was used. Smooth sideward motion interlaced the  
382 longitudinal velocity in the bees Fig. 2b-f, this lateral “casting” motion is also a common  
383 feature noted in previous experiments on bumblebee flight (Chang et al., 2016; Dyhr and  
384 Higgins, 2010; Linander et al., 2015; Ravi et al., 2013).

385

386 At around 375mm from the gap, evidence of changes in behavior is first noted as a  
387 reduction in flight speed, Fig. 3a. Insects and birds have been shown to respond to  
388 unpredictable or unfamiliar situations with reducing speed (Williams and Biewener,  
389 2015). In this region of the flight tunnel the angle subtended by the obstructing wall  
390 containing the gap and the gap itself is  $36^\circ - 42^\circ$  and  $9^\circ - 14^\circ$  respectively. (Baird et al.,  
391 2010) reported that bumblebees modulate their flight speed using the frontal optic flow  
392 and showed that bees responded to abrupt changes in flight tunnel width when it  
393 subtended between  $23^\circ - 30^\circ$  on the retina, which is consistent with our data. The bees  
394 could either be responding to the obstructing wall, the properties of the gap or the

395 combination of the two. In eliciting a change in flight speed of the bees there appears to  
396 be a combined influence of the obstructing wall and the distance between the gap and  
397 rear wall when the bees were between 375 – 225mm from the gap. In this region the  
398 first consistent reduction in flight speed of the bees across all conditions compared to  
399 when they were > 375mm was noted however it was statistically significant only when  $d$   
400 < 60mm, see Fig. 2a. Within this region, the mean optic flow difference across the edge  
401 of the gap was 60 – 120°/sec when  $d = 550$ mm, while the optic flow on the wall along  
402 the gap edge was only 3 - 12 °/sec for the extreme non-passable condition ( $d = 0$ ). The  
403 deceleration of the bees for the non-passable condition may be considered as that  
404 elicited purely by the obstructing wall. This suggests that in our experimental paradigm  
405 the prominence of the gap modulated the approach flight speed of the bees.  
406 Comparatively, when they were <225mm from the gap further reduction in flight speed  
407 appeared to be mainly influenced by the distance between the gap and rear wall (see,  
408 Fig. 3a).

409  
410

### 411 **Gap Perception**

412

413 For all conditions concomitant with decelerating longitudinal flight speed the bees  
414 increased their lateral speed as they neared the gap (Fig. 2). The bees also increased  
415 both lateral displacement and speed significantly as the distance between the gap and  
416 rear wall was decreased (Figs. 2 & 3). The total accelerations during these lateral  
417 maneuvers are higher closer to the gap and mainly oriented normal to the body long  
418 axis (Fig. 3). In such cases, the bees are “side slipping” performed by rolling their body to  
419 redirect their aerodynamic force vector in the direction of movement, similar to a  
420 helicopter (Ravi et al., 2016; Taylor, 2001). Such body roll mediated lateral maneuvers  
421 are usually coupled with synchronous counter-rotations of the head to maintain a stable  
422 visual field (Boeddeker and Hemmi, 2010; Doussot et al. in prep.). Performing lateral  
423 maneuvers where body yaw is limited significantly increases the lateral translational  
424 optic flow.

425

426 Flies, wasps and a number of other volant insects actively shape the optic flow on the  
427 retina by modulating their head and body trajectory to increase the translatory  
428 component while minimizing rotations (Egelhaaf et al., 2014). Optic flow derived from  
429 translation contains information on the relative distance between environmental  
430 features such as obstacles while optic flow from rotations lacks this vital information

431 wherefore volant insects tend to restrict rotations to rapid saccades (Egelhaaf et al.,  
432 2012a). Bumblebees flew in our tunnel with minimal yaw rotations (Fig. 1b-f) thus  
433 increasing translational optic flow. Optic flow derived through pure longitudinal motion  
434 is not much sensitive to distance differences in the frontal visual field, since the flow  
435 vectors are small close to focus of expansion. Increased optic flow sensitivity to distance  
436 differences between environmental features in the frontal visual field can be achieved,  
437 however, through lateral translation (motion parallax) (Collett, 2002). Even when the  
438 bees were seemingly uninfluenced by the obstacles (>375mm, Fig. 2), their flight path  
439 consisted of smooth lateral movements – casting. The significance of these voluntary  
440 lateral movements performed by the bees (Ravi et al., 2016) are unclear. However, they  
441 are likely to be used to increase lateral translational optic flow and, thus, to aid depth  
442 perception.

443

444 A consequence of the increased lateral translations performed by the bees in the  
445 proximity of the gap is the large difference in optic flow across the edges of the gap,  
446 thereby increasing their salience (Fig. 4b-f). An example of active shaping of optic flow  
447 through flight maneuverers can be seen by comparing the generated optic flow when  
448 the rear wall was 150mm and 60mm, respectively, behind the gap (Fig. 4a). For these  
449 two conditions, when the bees were far (>225mm) the difference in optic flow across  
450 the gap edge was significantly higher than when the  $d > 150\text{mm}$ . However, in near field  
451 of the gap (<75mm), due to the increased lateral maneuvers of the bees, the optic flow  
452 difference across the gap edge was with 200 – 400 °/sec similar to the  $d = 550\text{mm}$   
453 condition (Fig. 4a). Active maneuvering in order to discern depth and increase salience  
454 of the edges appears to be a compensatory strategy of the bees to the changing distance  
455 of the rear wall. Wasps, honeybees and other insects have been observed to perform  
456 nominally similar flight maneuvers, which consist of large lateral components, for  
457 instance, during their learning flights after leaving an attractive goal location, such as a  
458 food source or a nest hole (Zeil, 1996; Dittmar et al. 2010; Lobecke et al. 2018). Here we  
459 show that bees actively modulate such behavior in a gap perception context and it  
460 appears to depend on the salience of the gap.

461

462 In this case bees are likely utilizing a combination of information about the velocity of  
463 self-motion, which is related to the input motor signals, and the relative optic flow in  
464 discerning the gap salience. The monotonic increase in lateral velocity with decreasing  
465 distance between the gap and rear wall does not increase at the same rate until the  
466 extreme condition when the gap and rear wall are adjacent (Fig. 2c). Our results suggest

467 that it is likely that there exists a threshold dependent on salience of the gap. We believe  
468 this threshold might reflect “passability” based upon identifying gap properties  
469 including depth through lateral maneuvering. If the bees cannot assess safe passage,  
470 they might resort to searching for alternative gaps in the environment or may fly back.  
471 The nominally crescent-shaped flight pattern of the bees close to the gap for the cases  
472 where the rear wall was <60mm bears similarity to searching flights and orientation or  
473 learning flights performed by bumblebees upon their first departure from their nest  
474 hole where they are assumed to probe the layout of the behaviorally relevant nest hole  
475 environment (Lobecke et al., 2018; Philippides et al., 2013; Riabinina et al., 2014).

476  
477 When confronted with a wall unexpectedly blocking their flight path, the bees search for  
478 a gap and, therefore, need to probe the spatial layout of the environment. In such  
479 conditions bees might utilize a number of cues, including brightness differences, to  
480 ascertain the presence of gaps (Baird and Dacke, 2016), but, in particular as shown in  
481 the present study, optic flow information. A number of factors are also likely to  
482 influence the flight pattern of the bees in this condition including the geometry of the  
483 flight tunnel and the obstacles. However, the similarity between the flights when  
484 negotiating the gap in our flight tunnel to learning and searching flights of bees observed  
485 in the context of local homing behavior merits further investigation. We suggest that in  
486 both situation these characteristic meandering lateral flight manoeuvres serve the same  
487 basic purpose, i.e. probing the spatial layout of the environment.

488

489

#### 490 **Time to Decision**

491

492 When flying within a complex cluttered environment an animal constantly needs to  
493 evaluate the environmental features confronting it and to make decisions that influence  
494 the flight course. Bees spend significant time in the near vicinity of the gap while  
495 performing the rapid lateral maneuvers (Fig. 5b). The consistent repeated flights of the  
496 bees, especially when the rear wall was <60mm to the gap, suggests that through these  
497 flights the bees not only discern the gap geometry but also evaluate passability. Once the  
498 potential for safe passage is established traversal through the gap occurs. Measuring the  
499 time spent by the bees within the region where most of the lateral maneuvers occur  
500 might provide an indication of the time taken by the bees in arriving at a decision.  
501 Among all flights recorded none of the bees performed abrupt corrective maneuvers

502 once gap traversal had commenced indicating that decision-making occurs ahead of the  
503 gap.

504

505 The optic flow contrast appears to be a critical parameter due to a strong and direct  
506 inverse relationship with respect to the time spent by the bees evaluating the gap (Fig.  
507 5). Through the repeated lateral movements, the bees appear to establish saliency of and  
508 confidence about the geometry by actively generating visual information about  
509 passability. The smaller the salience of the gap, the larger are the sideways velocities in  
510 order to increase optic flow contrast and the longer do the bees probe the environment  
511 to increase their confidence about the situation. As a consequence, decision-making is  
512 delayed. Other factors such as familiarity and experience, though unlikely to play a  
513 significant role in these experiments, are also likely to influence the bees' decision time  
514 in assessing gap properties and passability in their natural environment, and further  
515 experiments are necessary to quantify the influence of these factors on the neural and  
516 biophysical mechanics of locomotion through spatially complex environments.

517

## 518 **Acknowledgements**

519 The project is funded by the Alexander von Humboldt Foundation through a Research  
520 Fellowship awarded to Sridhar Ravi as well as supported by the Deutsche  
521 Forschungsgemeinschaft (DFG grant number OJNB: EG82/19-1) and by the Cluster of  
522 Excellence EX 277 Cognitive Interaction Technology (CITEC), funded by DFG.

523

## 524 **References**

525

526 **Baird, E. and Dacke, M.** (2012). Visual flight control in naturalistic and artificial  
527 environments. *J. Comp. Physiol. A. Neuroethol. Sens. Neural. Behav. Physiol.* **198**,  
528 869–76.

529 **Baird, E. and Dacke, M.** (2016). Finding the gap: a brightness-based strategy for  
530 guidance in cluttered environments. *Proceedings. Biol. Sci.* **283**, 20152988.

531 **Baird, E., Kornfeldt, T. and Dacke, M.** (2010). Minimum viewing angle for visually  
532 guided ground speed control in bumblebees. *J. Exp. Biol.* **213**, 1625–32.

533 **Baird, E., Boeddeker, N., Ibbotson, M. R. and Srinivasan, M. V** (2013). A universal  
534 strategy for visually guided landing. *Proc. Natl. Acad. Sci. U. S. A.* **110**, 18686–91.

535 **Bertrand, O. J. N., Lindemann, J. P. and Egelhaaf, M.** (2015). A Bio-inspired Collision  
536 Avoidance Model Based on Spatial Information Derived from Motion Detectors  
537 Leads to Common Routes. *PLoS Comput. Biol.* **11**, e1004339.

- 538 **Bhagavatula, P. S., Claudianos, C., Ibbotson, M. R. and Srinivasan, M. V** (2011). Optic  
539 flow cues guide flight in birds. *Curr. Biol.* **21**, 1794–9.
- 540 **Boeddeker, N. and Hemmi, J. M.** (2010). Visual gaze control during peering flight  
541 manoeuvres in honeybees. *Proceedings. Biol. Sci.* **277**, 1209–17.
- 542 **Boeddeker, N., Dittmar, L., Sturzl, W., Egelhaaf, M., Stürzl, W. and Egelhaaf, M.**  
543 (2010). The fine structure of honeybee head and body yaw movements in a homing  
544 task. *Proc. R. Soc. B Biol. Sci.* **277**, 1899–1906.
- 545 **Braun, E., Geurten, B. and Egelhaaf, M.** (2010). Identifying Prototypical Components in  
546 Behaviour Using Clustering Algorithms. *PLoS One* **5**, e9361.
- 547 **Braun, E., Dittmar, L., Boeddeker, N. and Egelhaaf, M.** (2012). Prototypical  
548 Components of Honeybee Homing Flight Behavior Depend on the Visual  
549 Appearance of Objects Surrounding the Goal. *Front. Behav. Neurosci.* **6**, 1.
- 550 **Chang, J. J., Crall, J. D. and Combes, S. A.** (2016). Wind alters landing dynamics in  
551 bumblebees. *J. Exp. Biol.* **219**, 2819–2822.
- 552 **Collett, T. S.** (2002). Insect Vision: Controlling Actions through Optic Flow. *Curr. Biol.*  
553 **12**, R615–R617.
- 554 **Crall, J. D., Ravi, S., Montcastle, A. A. and Combes, S. A.** (2014). Bigger but not always  
555 better: Tradeoffs between maneuverability and flight speed with body size in  
556 bumblebees. In *Integrative and comparative biology*, pp. E44–E44. OXFORD UNIV  
557 PRESS INC.
- 558 **Crall, J. D., Ravi, S., Mountcastle, A. M. and Combes, S. A.** (2015). Bumblebee flight  
559 performance in cluttered environments: effects of obstacle orientation, body size  
560 and acceleration. *J. Exp. Biol.* **218**, 2728–37.
- 561 **Dickinson, M. H.** (2005). The initiation and control of rapid flight maneuvers in fruit  
562 flies. *Integr. Comp. Biol.* **45**, 274–81.
- 563 **Dudley, R.** (2002). *The Biomechanics of Insect Flight: Form, Function, Evolution.*  
564 Princeton University Press.
- 565 **Dyhr, J. P. and Higgins, C. M.** (2010). The spatial frequency tuning of optic-flow-  
566 dependent behaviors in the bumblebee *Bombus impatiens*. *J. Exp. Biol.* **213**, 1643–  
567 50.
- 568 **Egelhaaf, M., Kern, R., Lindemann, J. P., Braun, E. and Geurten, B.** (2010). Active  
569 Vision in Blowflies: Strategies and Mechanisms of Spatial Orientation. In *Flying*  
570 *Insects and Robots*, pp. 51–61. Springer Berlin Heidelberg.
- 571 **Egelhaaf, M., Boeddeker, N., Kern, R., Kurtz, R. and Lindemann, J. P.** (2012a). Spatial  
572 vision in insects is facilitated by shaping the dynamics of visual input through  
573 behavioral action. *Front. Neural Circuits* **6**, 108.



- 574 **Egelhaaf, M., Boeddeker, N., Kern, R., Kurtz, R. and Lindemann, J. P.** (2012b). Spatial  
575 vision in insects is facilitated by shaping the dynamics of visual input through  
576 behavioral action. *Front. Neural Circuits* **6**, 108.
- 577 **Egelhaaf, M., Kern, R. and Lindemann, J. P.** (2014). Motion as a source of  
578 environmental information: a fresh view on biological motion computation by  
579 insect brains. *Front. Neural Circuits* **8**, 127.
- 580 **Floreano, D., Zufferey, J. C., Srinivasan, M. V. and Ellington, C.** (2010). *Flying Insects*  
581 *and Robots*. (ed. Floreano, D.), Zufferey, J.-C.), Srinivasan, M. V.), and Ellington, C.)  
582 Berlin, Heidelberg: Springer Berlin Heidelberg.
- 583 **Hateren, J. and Schilstra, C.** (1999). Blowfly flight and optic flow. II. Head movements  
584 during flight. *J. Exp. Biol.* **202 (Pt 11)**, 1491–500.
- 585 **Kern, R., Boeddeker, N., Dittmar, L. and Egelhaaf, M.** (2012). Blowfly flight  
586 characteristics are shaped by environmental features and controlled by optic flow  
587 information. *J. Exp. Biol.* **215**, 2501–14.
- 588 **Knaden, M. and Graham, P.** (2016). The Sensory Ecology of Ant Navigation: From  
589 Natural Environments to Neural Mechanisms. *Annu. Rev. Entomol.* **61**, 63–76.
- 590 **Linander, N., Dacke, M. and Baird, E.** (2015). Bumblebees measure optic flow for  
591 position and speed control flexibly within the frontal visual field. *J. Exp. Biol.* **218**,  
592 1051–9.
- 593 **Lobecke, A., Kern, R. and Egelhaaf, M.** (2018). Taking a goal-centred dynamic snapshot  
594 as a possibility for local homing in initially naïve bumblebees. *J. Exp. Biol.* **221**,  
595 jeb.168674.
- 596 **Mertes, M., Dittmar, L. and Egelhaaf, M.** (2015). Bumblebee homing: The fine structure  
597 of head turning movements. *Plos Biol.* **under revi.**
- 598 **Mirwan, H. B. and Kevan, P. G.** (2013). Social Learning in Bumblebees (*Bombus*  
599 *impatiens*): Worker Bumblebees Learn to Manipulate and Forage at Artificial  
600 Flowers by Observation and Communication within the Colony. *Psyche A J. Entomol.*  
601 **2013**, 1–8.
- 602 **Monteagudo, J., Lindemann, J. P. and Egelhaaf, M.** (2017). Head orientation of walking  
603 blowflies is controlled by visual and mechanical cues. *J. Exp. Biol.* **220**, 4578–4582.
- 604 **Ong, M., Bulmer, M., Groening, J. and Srinivasan, M. V.** (2017). Obstacle traversal and  
605 route choice in flying honeybees: Evidence for individual handedness. *PLoS One* **12**,  
606 e0184343.
- 607 **Osborne, J. L., Martin, A. P., Carreck, N. L., Swain, J. L., Knight, M. E., Goulson, D.,**  
608 **Hale, R. J. and Sanderson, R. A.** (2008). Bumblebee flight distances in relation to  
609 the forage landscape. *J. Anim. Ecol.* **77**, 406–15.

- 610 **Philippides, A., de Ibarra, N. H., Riabinina, O. and Collett, T. S.** (2013). Bumblebee  
611 calligraphy: the design and control of flight motifs in the learning and return flights  
612 of *Bombus terrestris*. *J. Exp. Biol.* **216**, 1093–104.
- 613 **Ravi, S., Crall, J. D., Fisher, A. and Combes, S. A.** (2013). Rolling with the flow:  
614 bumblebees flying in unsteady wakes. *J. Exp. Biol.* **216**, 4299–309.
- 615 **Ravi, S., Kolomenskiy, D., Engels, T., Schneider, K., Wang, C., Sesterhenn, J. and Liu,**  
616 **H.** (2016). Bumblebees minimize control challenges by combining active and  
617 passive modes in unsteady winds. *Sci. Rep.* **6**, 35043.
- 618 **Riabinina, O., de Ibarra, N. H., Philippides, A. and Collett, T. S.** (2014). Head  
619 movements and the optic flow generated during the learning flights of bumblebees.  
620 *J. Exp. Biol.* **217**, 2633–42.
- 621 **Schiffner, I., Vo, H. D., Bhagavatula, P. S. and Srinivasan, M. V** (2014). Minding the  
622 gap: in-flight body awareness in birds. *Front. Zool.* **11**, 64.
- 623 **Schilstra, C. and Hateren, J.** (1999). Blowfly flight and optic flow. I. Thorax kinematics  
624 and flight dynamics. *J. Exp. Biol.* **202** (Pt **11**), 1481–90.
- 625 **Serres, J. R. and Ruffier, F.** (2017). Optic flow-based collision-free strategies: From  
626 insects to robots. *Arthropod Struct. Dev.* **46**, 703–717.
- 627 **Serres, J., Dray, D., Ruffier, F. and Franceschini, N.** (2008). A vision-based autopilot  
628 for a miniature air vehicle: joint speed control and lateral obstacle avoidance. *Aut.*  
629 *Robot* **25**, 103–122.
- 630 **Shyy, W., Kang, C.-K., Chirarattananon, P., Ravi, S. and Liu, H.** (2016). Aerodynamics,  
631 sensing and control of insect-scale flapping-wing flight. *Proc. R. Soc. A Math. Phys.*  
632 *Eng. Sci.* **472**,.
- 633 **Srinivasan, M. V** (2010). Honey bees as a model for vision, perception, and cognition.  
634 *Annu. Rev. Entomol.* **55**, 267–84.
- 635 **Srinivasan, M. V.** (2015). Where paths meet and cross: navigation by path integration in  
636 the desert ant and the honeybee. *J. Comp. Physiol. A* **201**, 533–546.
- 637 **Srinivasan, M. V and Zhang, S. W.** (1997). Visual control of honeybee flight. *EXS* **84**,  
638 95–113.
- 639 **Taylor, G. K.** (2001). Mechanics and aerodynamics of insect flight control. *Biol. Rev.*  
640 *Camb. Philos. Soc.* **76**, 449–471.
- 641 **van Breugel, F., Morgansen, K. and Dickinson, M. H.** (2014). Monocular distance  
642 estimation from optic flow during active landing maneuvers. *Bioinspir. Biomim.* **9**,  
643 25002.
- 644 **Williams, C. D. and Biewener, A. A.** (2015). Pigeons trade efficiency for stability in  
645 response to level of challenge during confined flight. *Proc. Natl. Acad. Sci.* **112**,

646 3392–3396.

647 **Zeil, J.** (1996). The control of optic flow during learning flights. *J. Comp. Physiol. A*

648 *Sensory, Neural, Behav. Physiol.* **180**, 25–37.

649

650

651

652

653

654

655

656

657

658

659

660

661

662

663

664

665

666

667

668

669

670

671

672

673

674

675

676

677

678

679

680

681

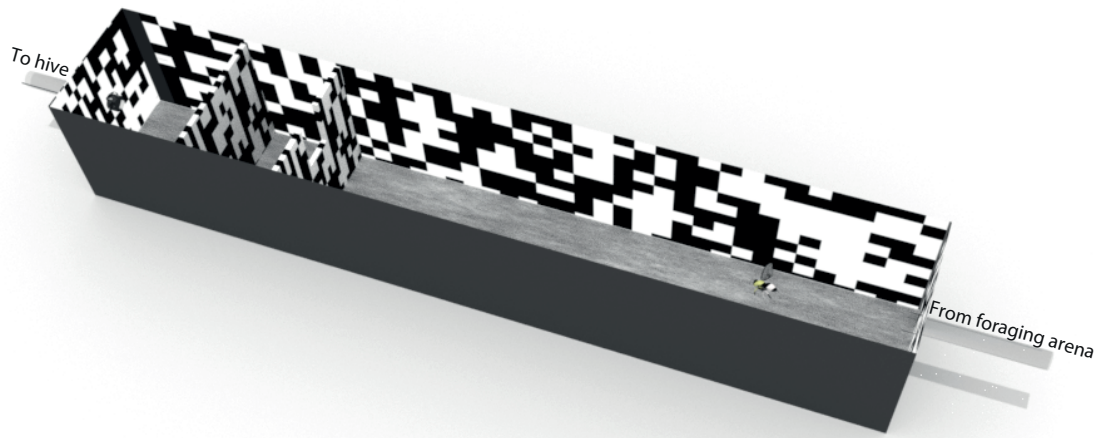

682

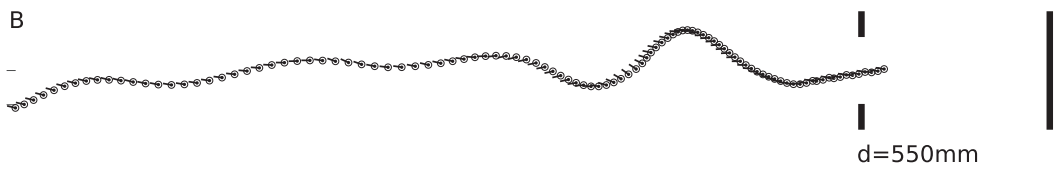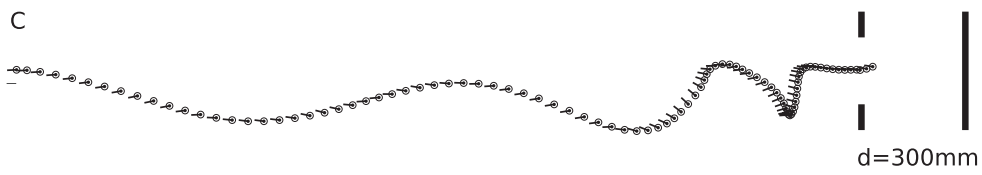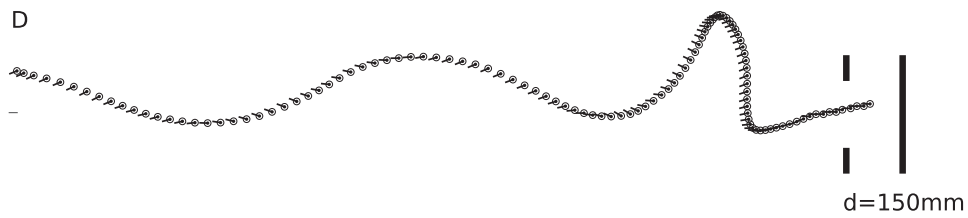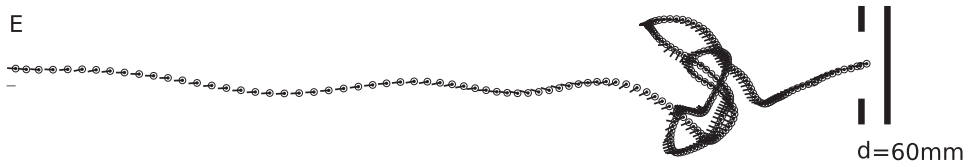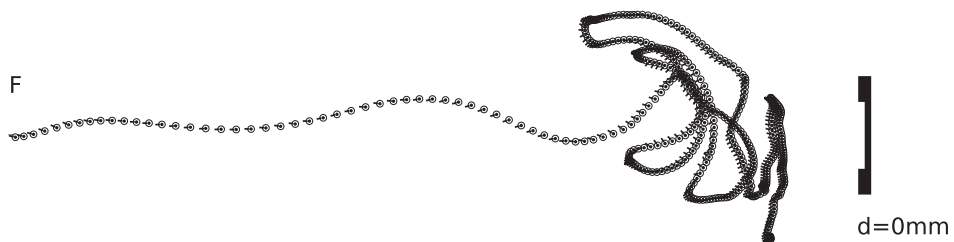

683

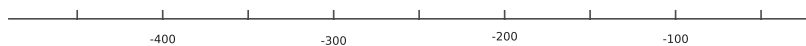

684 Fig.1 a) Schematic of the experiment setup, d represents the distance between the wall  
685 containing the gap to the rear wall. Only the flight of bees returning to the hive from the  
686 foraging arena was considered for analysis. Sample flight trajectory of a bee when the  
687 distance between the gap and rear wall was 550mm (b), 300mm (c), 150mm (d), 60mm  
688 (e) and 0mm (f). The gap and rear wall on the right are for illustrative purposes only  
689 and not to scale.

690

691

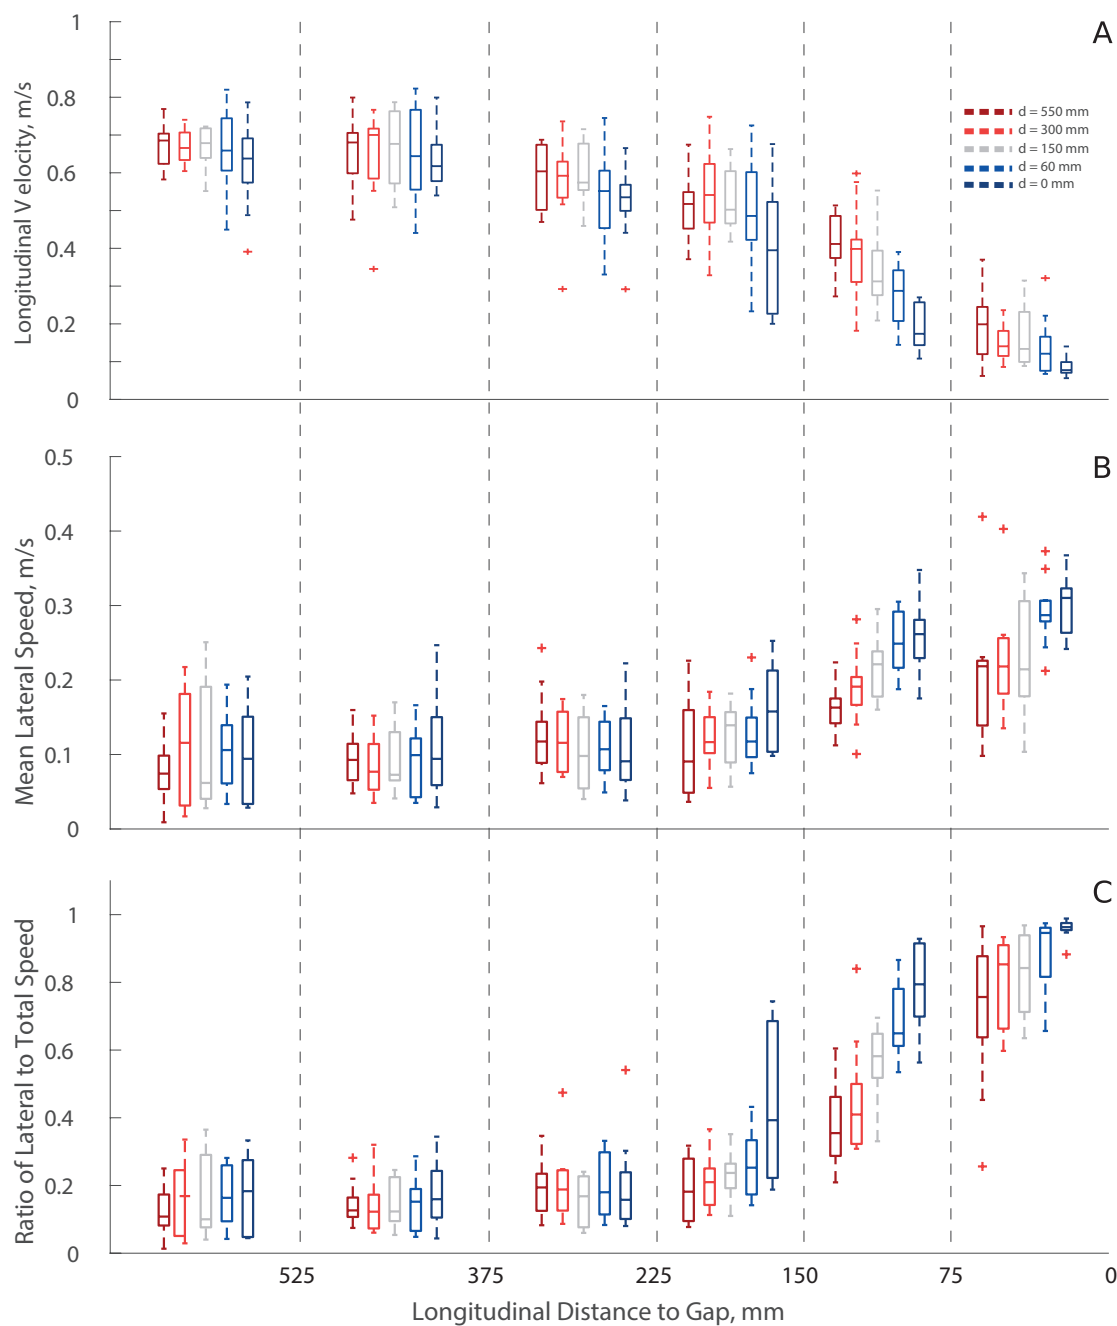

692

693 Figure 2. The flight tunnel was binned into six sections leading to the gap. a) The

694 absolute mean longitudinal velocity of the bees at different longitudinal distances from

695 the gap. b) The absolute mean lateral velocity of the bees at different sections of the  
696 flight tunnel. c) Ratio of the mean absolute lateral velocity and the total velocity.

697

698

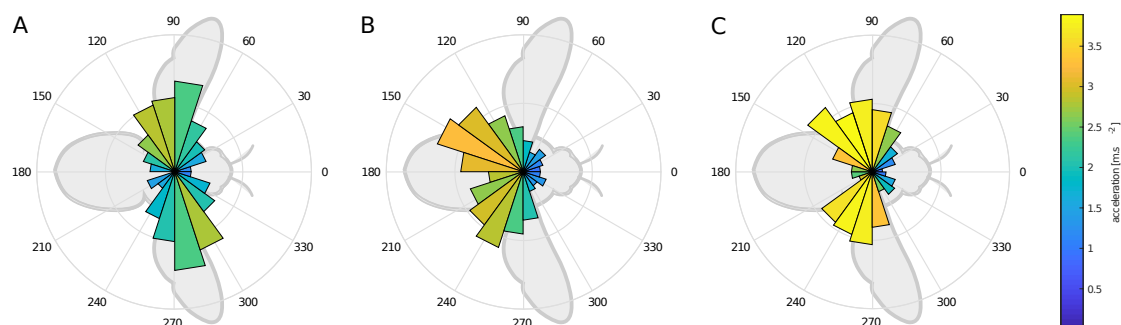

699

700 Figure 3. Rose histogram of the total acceleration with respect to long body axis among  
701 all flights at different section of the flight tunnel a) 300mm - 200mm, b) 200mm -  
702 100mm & c) 100mm - 0mm. The length of each angular column in the rose histogram  
703 indicates the probability of the total acceleration of the bee to be within the range of the  
704 respective bin. The hue represents the magnitude of mean acceleration within the  
705 respective angular bins.

706

707

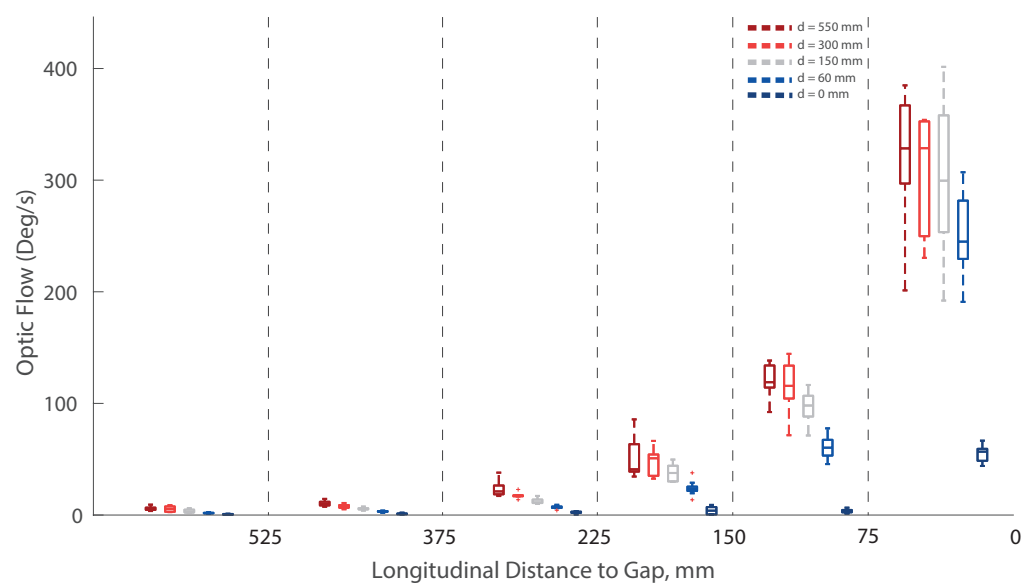

708

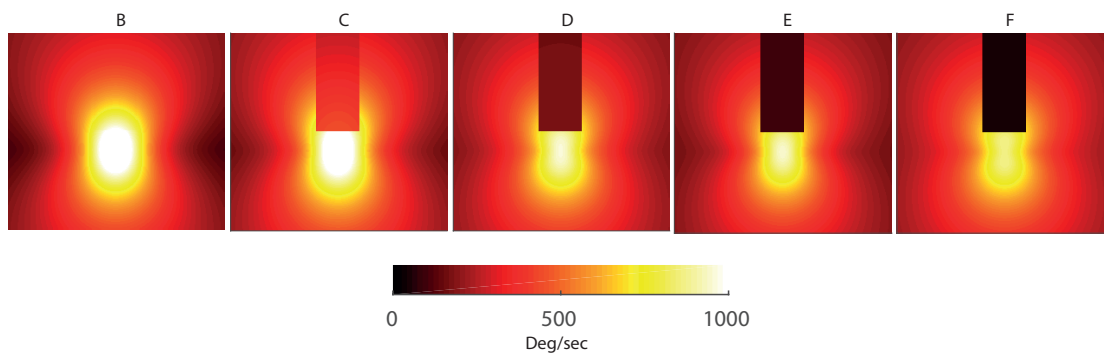

709

710 Figure 4. a) The mean of the absolute difference in total optic flow across the inside and  
711 outside edge of the gap ( $\pm 12$  mm along gap edge) at different sections of the flight  
712 tunnel. b-f) Heat map showing the mean geometric optic flow over the wall containing  
713 the gap across all flight trajectories when the bees were  $< 75$  mm to the gap. The  
714 geometric optic flow was calculated taking into account both the longitudinal and lateral  
715 translation as well as yaw rotations of the bees as they approached the gap.

716

717

718

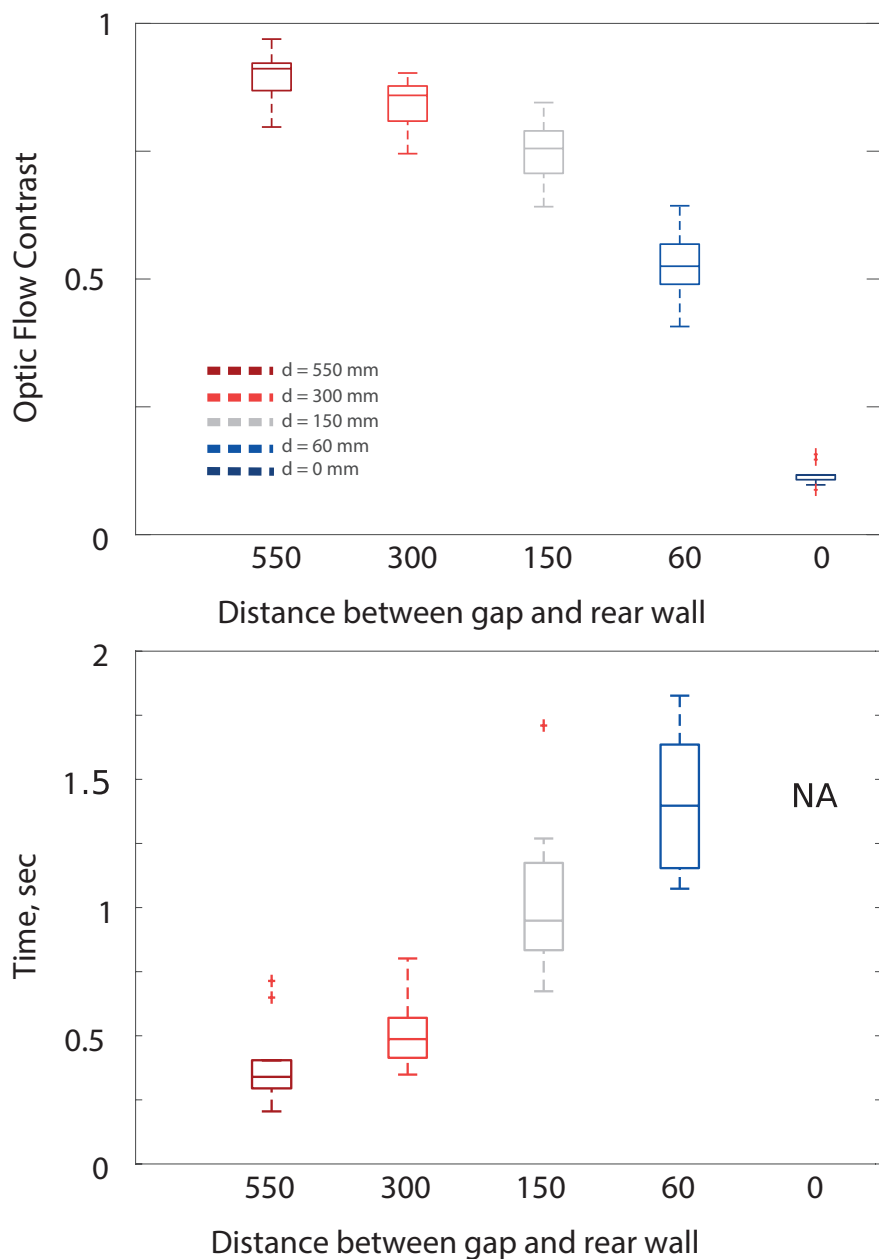

719

720

721 Figure 5. Optic flow contrast measured as the ratio between mean difference in optic

722 flow across the edge of the gap and the optic flow along the outer edge of the gap. (b)

723 Time spent by the bees in the vicinity of the gap (< 100mm) for the different experiment

724 conditions.

725

726

727
